# Supplementary material for: Mast Cell and M1 Macrophage Infiltration and Local Pro-Inflammatory Factors Were Attenuated with Incretin-Based Therapies in Obesity-Related Glomerulopathy
Source: PubMed Central journal article supplement — Metab Syndr Relat Disord. 2017 Sep 1;15(7):344–53. doi: 10.1089/met.2017.0057 (PMC5576269; doi:10.1089/met.2017.0057), 2017-09-01
Supplement: Supp_Fig1.pdf [file Supp_Fig1.pdf]

## Supplementary Data

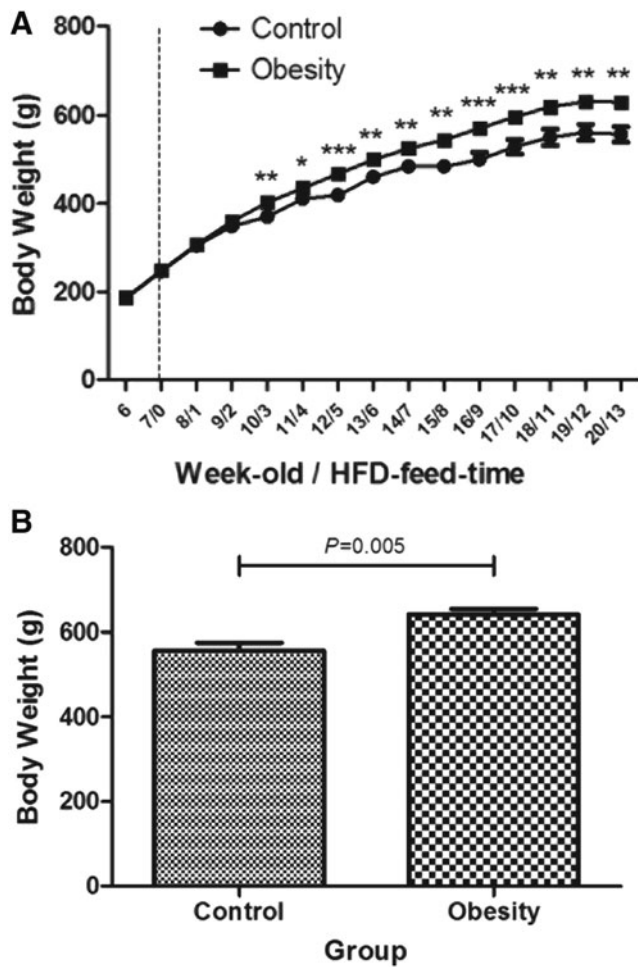

**SUPPLEMENTARY FIG. S1.** Body weights of rats. **(A)** Body weight changes. **(B)** Body weight before treatments. Control,  $n=10$ ; obesity,  $n=22$ .  $*P<0.05$ ,  $**P<0.01$ ,  $***P<0.001$  versus lean control.
