# Supplementary material for: Mast Cell and M1 Macrophage Infiltration and Local Pro-Inflammatory Factors Were Attenuated with Incretin-Based Therapies in Obesity-Related Glomerulopathy
Source: PubMed Central journal article supplement — Metab Syndr Relat Disord. 2017 Sep 1;15(7):344–53. doi: 10.1089/met.2017.0057 (PMC5576269; doi:10.1089/met.2017.0057), 2017-09-01
Supplement: Supp_Fig2.pdf [file Supp_Fig2.pdf]

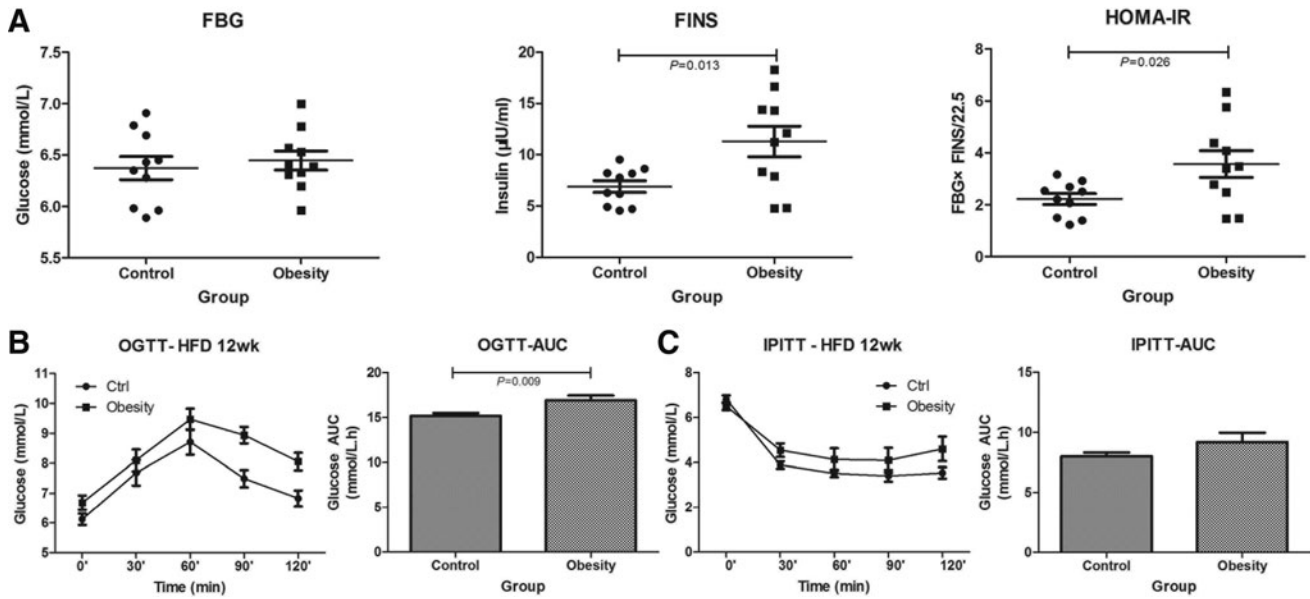

**SUPPLEMENTARY FIG. S2.** Glucose and insulin level, as well as insulin sensitivity evaluation, of ORG rats before treatments. **(A)** FBG level was of no significant difference, while FINS and HOMA-IR were significantly increased compared with control group. **(B)** The AUC of glucose in OGTT was significantly larger than that in control group. **(C)** The AUC of glucose in IPITT was of no significant difference. Control,  $n=10$ ; obesity,  $n=10$ . AUC, area under the curve; FBG, fasting blood glucose; FINS, fasting insulin; HOMA-IR, homeostasis model assessment of insulin resistance ( $\text{HOMA-IR} = \text{FBG} \times \text{FINS} / 22.5$ ); IPITT, intraperitoneal insulin tolerance test; OGTT, oral glucose tolerance test; ORG, obesity-related glomerulopathy.
