# Supplementary material for: Mast Cell and M1 Macrophage Infiltration and Local Pro-Inflammatory Factors Were Attenuated with Incretin-Based Therapies in Obesity-Related Glomerulopathy
Source: PubMed Central journal article supplement — Metab Syndr Relat Disord. 2017 Sep 1;15(7):344–53. doi: 10.1089/met.2017.0057 (PMC5576269; doi:10.1089/met.2017.0057), 2017-09-01
Supplement: Supp_Fig4.pdf [file Supp_Fig4.pdf]

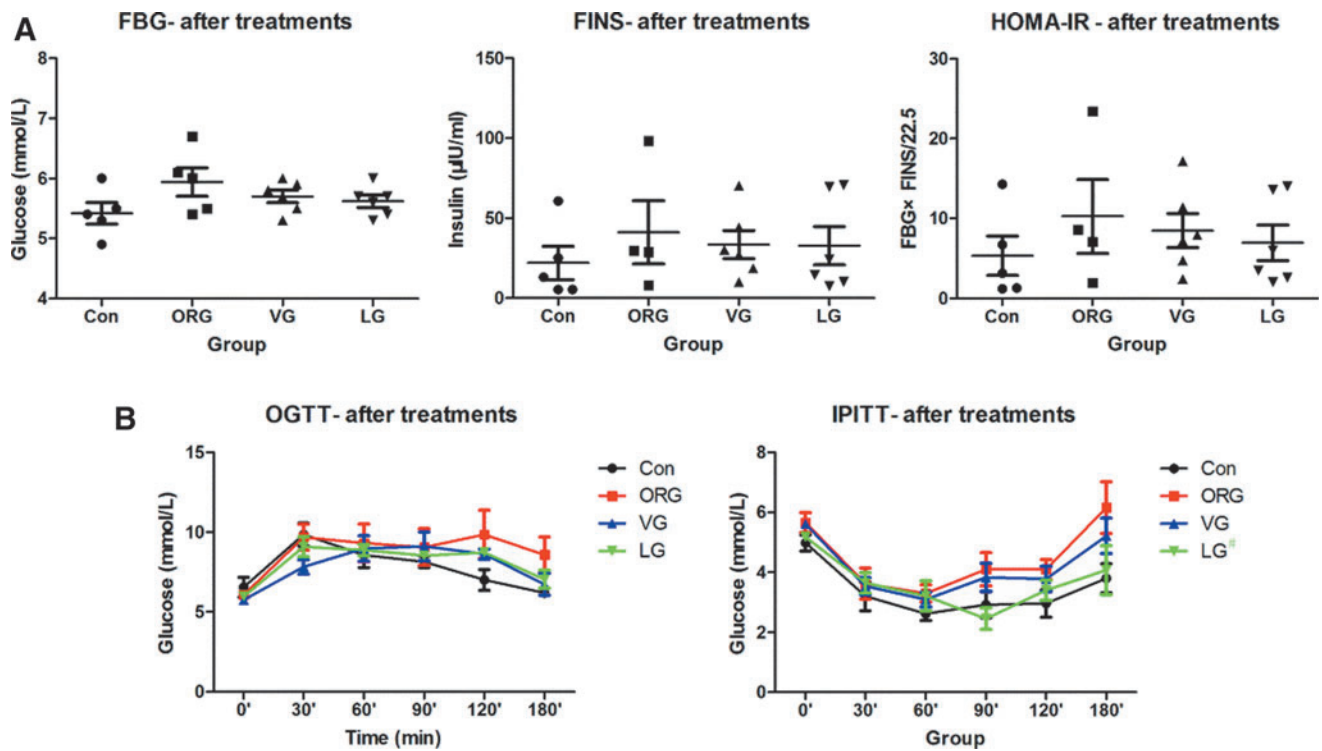

**SUPPLEMENTARY FIG. S4.** Incretin-based treatments improved insulin sensitivity of ORG rats. **(A)** FBG, FINS, and HOMA-IR levels were reduced without significant difference after treatments. **(B)** The AUC of glucose in IPITT was significantly decreased in LG group ( $P=0.021$ ), while AUC of glucose in OGTT was reduced without significant difference in both groups.  $^{\#}P<0.05$  versus ORG vehicle.
