# Supplementary material for: Mast Cell and M1 Macrophage Infiltration and Local Pro-Inflammatory Factors Were Attenuated with Incretin-Based Therapies in Obesity-Related Glomerulopathy
Source: PubMed Central journal article supplement — Metab Syndr Relat Disord. 2017 Sep 1;15(7):344–53. doi: 10.1089/met.2017.0057 (PMC5576269; doi:10.1089/met.2017.0057), 2017-09-01
Supplement: Supp_Table3.pdf [file Supp_Table3.pdf]

SUPPLEMENTARY TABLE S3. POSITIVE CELL NUMBERS OF MAST CELLS AND M1 AND M2 MACROPHAGES

| <i>Positive cell number</i> | <i>Con</i> (n=5) | <i>ORG</i> (n=4)         | <i>VG</i> (n=6)          | <i>LG</i> (n=6)          |
|-----------------------------|------------------|--------------------------|--------------------------|--------------------------|
| Mast cell (Tryptase)        | 1 ± 0.4          | 19 ± 6 <sup>a</sup>      | 4 ± 1 <sup>b</sup>       | 7 ± 2 <sup>b</sup>       |
| M1 macrophage (CD68)        | 4 ± 1            | 43 ± 8 <sup>a</sup>      | 20 ± 6 <sup>b</sup>      | 18 ± 6 <sup>b</sup>      |
| M2 macrophage (CD206)       | 90 ± 6           | 75 ± 6                   | 82 ± 4                   | 95 ± 2                   |
| M1/M2 (ratio)               | 0.05 ± 0.02      | 0.57 ± 0.09 <sup>a</sup> | 0.25 ± 0.04 <sup>b</sup> | 0.19 ± 0.02 <sup>b</sup> |

<sup>a</sup>*P* < 0.05 versus Con.

<sup>b</sup>*P* < 0.05 versus ORG vehicle.
