# Supplementary material for: Mast Cell and M1 Macrophage Infiltration and Local Pro-Inflammatory Factors Were Attenuated with Incretin-Based Therapies in Obesity-Related Glomerulopathy
Source: PubMed Central journal article supplement — Metab Syndr Relat Disord. 2017 Sep 1;15(7):344–53. doi: 10.1089/met.2017.0057 (PMC5576269; doi:10.1089/met.2017.0057), 2017-09-01
Supplement: Supp_Table4.pdf [file Supp_Table4.pdf]

SUPPLEMENTARY TABLE S4. PROTEIN AND MESSENGER RIBONUCLEIC ACID LEVEL OF PRO-INFLAMMATORY FACTORS

| <i>Inflammatory factors</i> | <i>Protein level</i> |                              |                              |                              | <i>mRNA level</i> |                 |                              |                              |
|-----------------------------|----------------------|------------------------------|------------------------------|------------------------------|-------------------|-----------------|------------------------------|------------------------------|
|                             | <i>Con</i>           | <i>ORG</i>                   | <i>VG</i>                    | <i>LG</i>                    | <i>Con</i>        | <i>ORG</i>      | <i>VG</i>                    | <i>LG</i>                    |
| TNF- $\alpha$               | 0.26 $\pm$ 0.04      | 0.46 $\pm$ 0.05 <sup>a</sup> | 0.26 $\pm$ 0.03 <sup>b</sup> | 0.19 $\pm$ 0.06 <sup>b</sup> | 1.00 $\pm$ 0.29   | 1.28 $\pm$ 0.09 | 0.67 $\pm$ 0.08 <sup>b</sup> | 0.62 $\pm$ 0.13 <sup>b</sup> |
| IL-6                        | 0.32 $\pm$ 0.02      | 0.84 $\pm$ 0.35 <sup>a</sup> | 0.23 $\pm$ 0.12 <sup>b</sup> | 0.49 $\pm$ 0.02              | 1.00 $\pm$ 0.24   | 1.23 $\pm$ 0.26 | 0.64 $\pm$ 0.10              | 0.53 $\pm$ 0.13 <sup>b</sup> |
| TGF- $\beta$ 1              | 1.29 $\pm$ 0.46      | 1.30 $\pm$ 0.23              | 1.26 $\pm$ 0.07              | 1.43 $\pm$ 0.43              | 1.03 $\pm$ 0.15   | 1.13 $\pm$ 0.20 | 1.01 $\pm$ 0.17              | 1.08 $\pm$ 0.22              |

<sup>a</sup> $P$ <0.05 versus Con.

<sup>b</sup> $P$ <0.05 versus ORG vehicle.

IL-6, interleukin-6; mRNA, messenger ribonucleic acid; TGF- $\beta$ , transforming growth factor- $\beta$ ; TNF- $\alpha$ , tumor necrosis factor- $\alpha$ .
